# Supplementary material for: A Study of Gastric Fluid and Urine Metabolomics for the Prediction of Survival in Severe Prematurity
Source: Preprints.org preprint supplement (doi:10.20944/preprints202305.0198.v1), 2023-05-04

# **Suppl. File 2. FIGURES S1-S10**

# **Gastric Fluid**

**Figure S1.** Separation of survivors vs non-survivors (DOL 15) based on metabolic profiles of gastric fluid using PLS-DA.


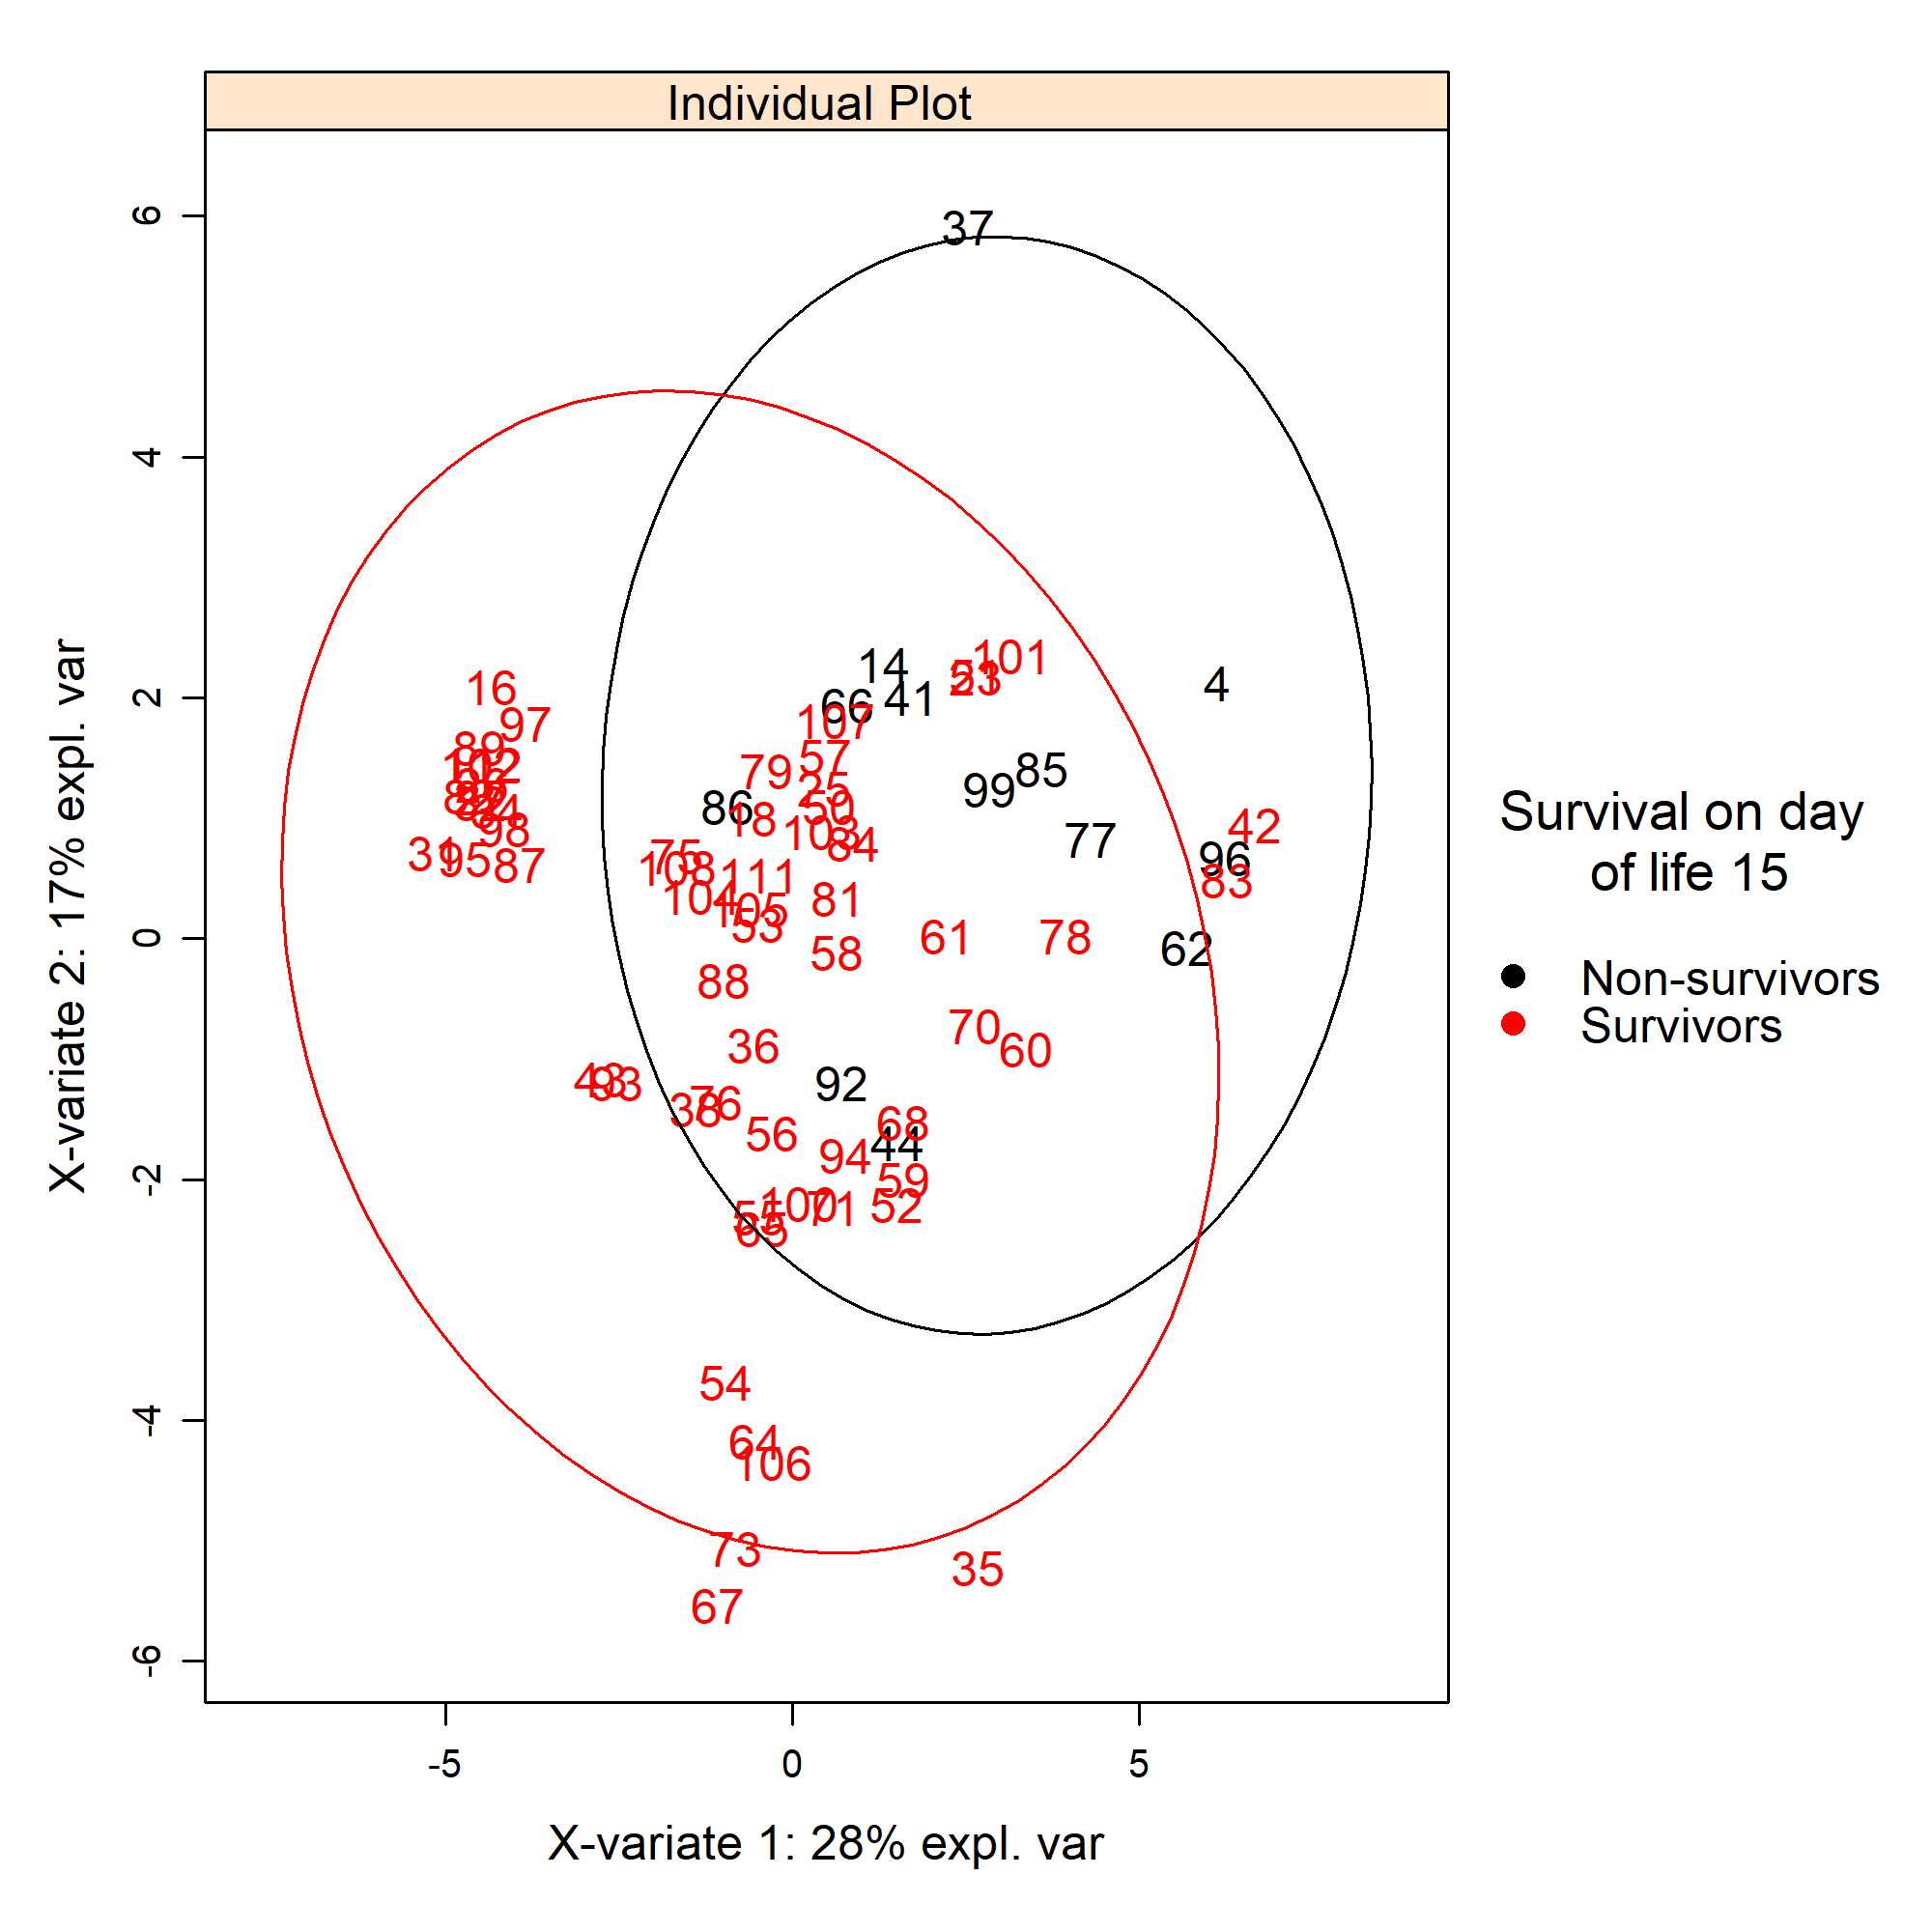


## **Figure S2.** Hierarchical cluster analysis of survivors vs non-survivors (DOL 15) based on metabolic profiles of gastric fluid. Patterns of visual separability are apparent.

##


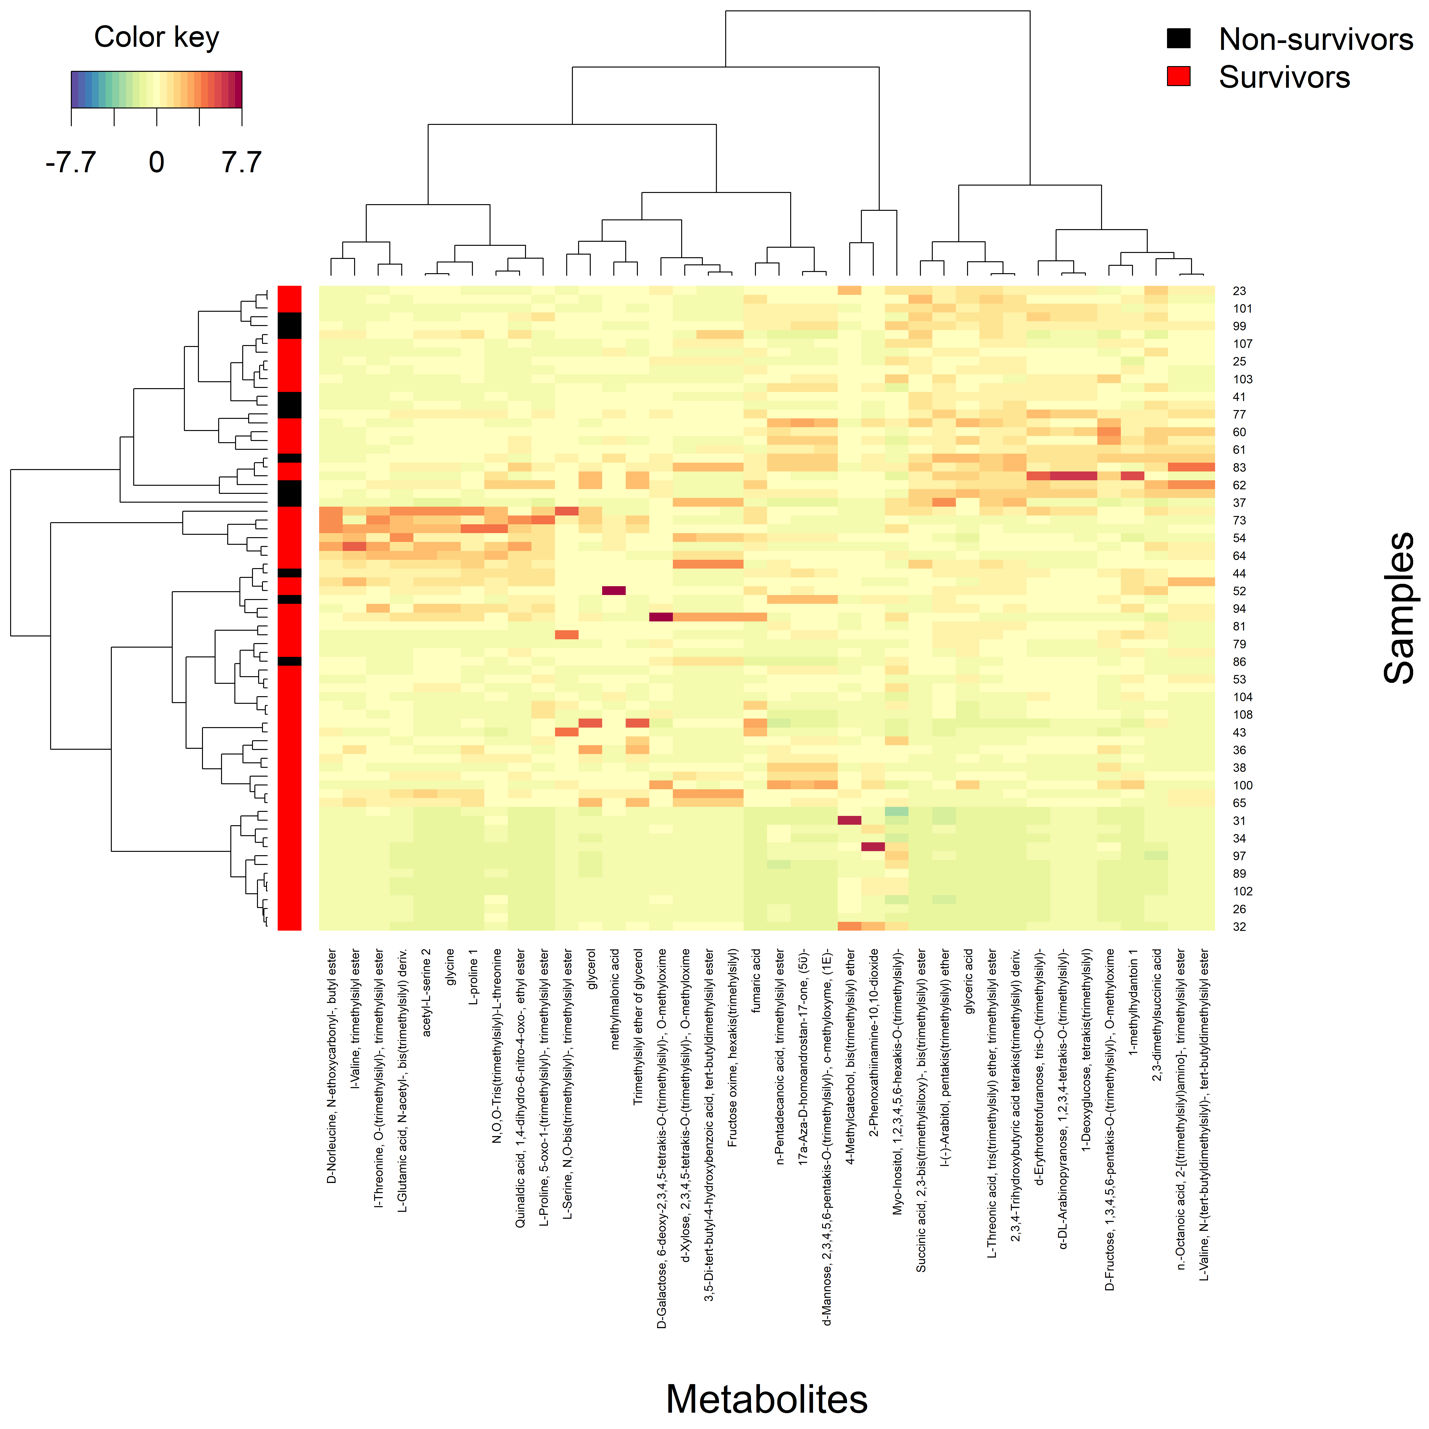


**Figure S3.** Separation of survivors vs non-survivors (overall survival) based on metabolic profiles of gastric fluid using PLS-DA.


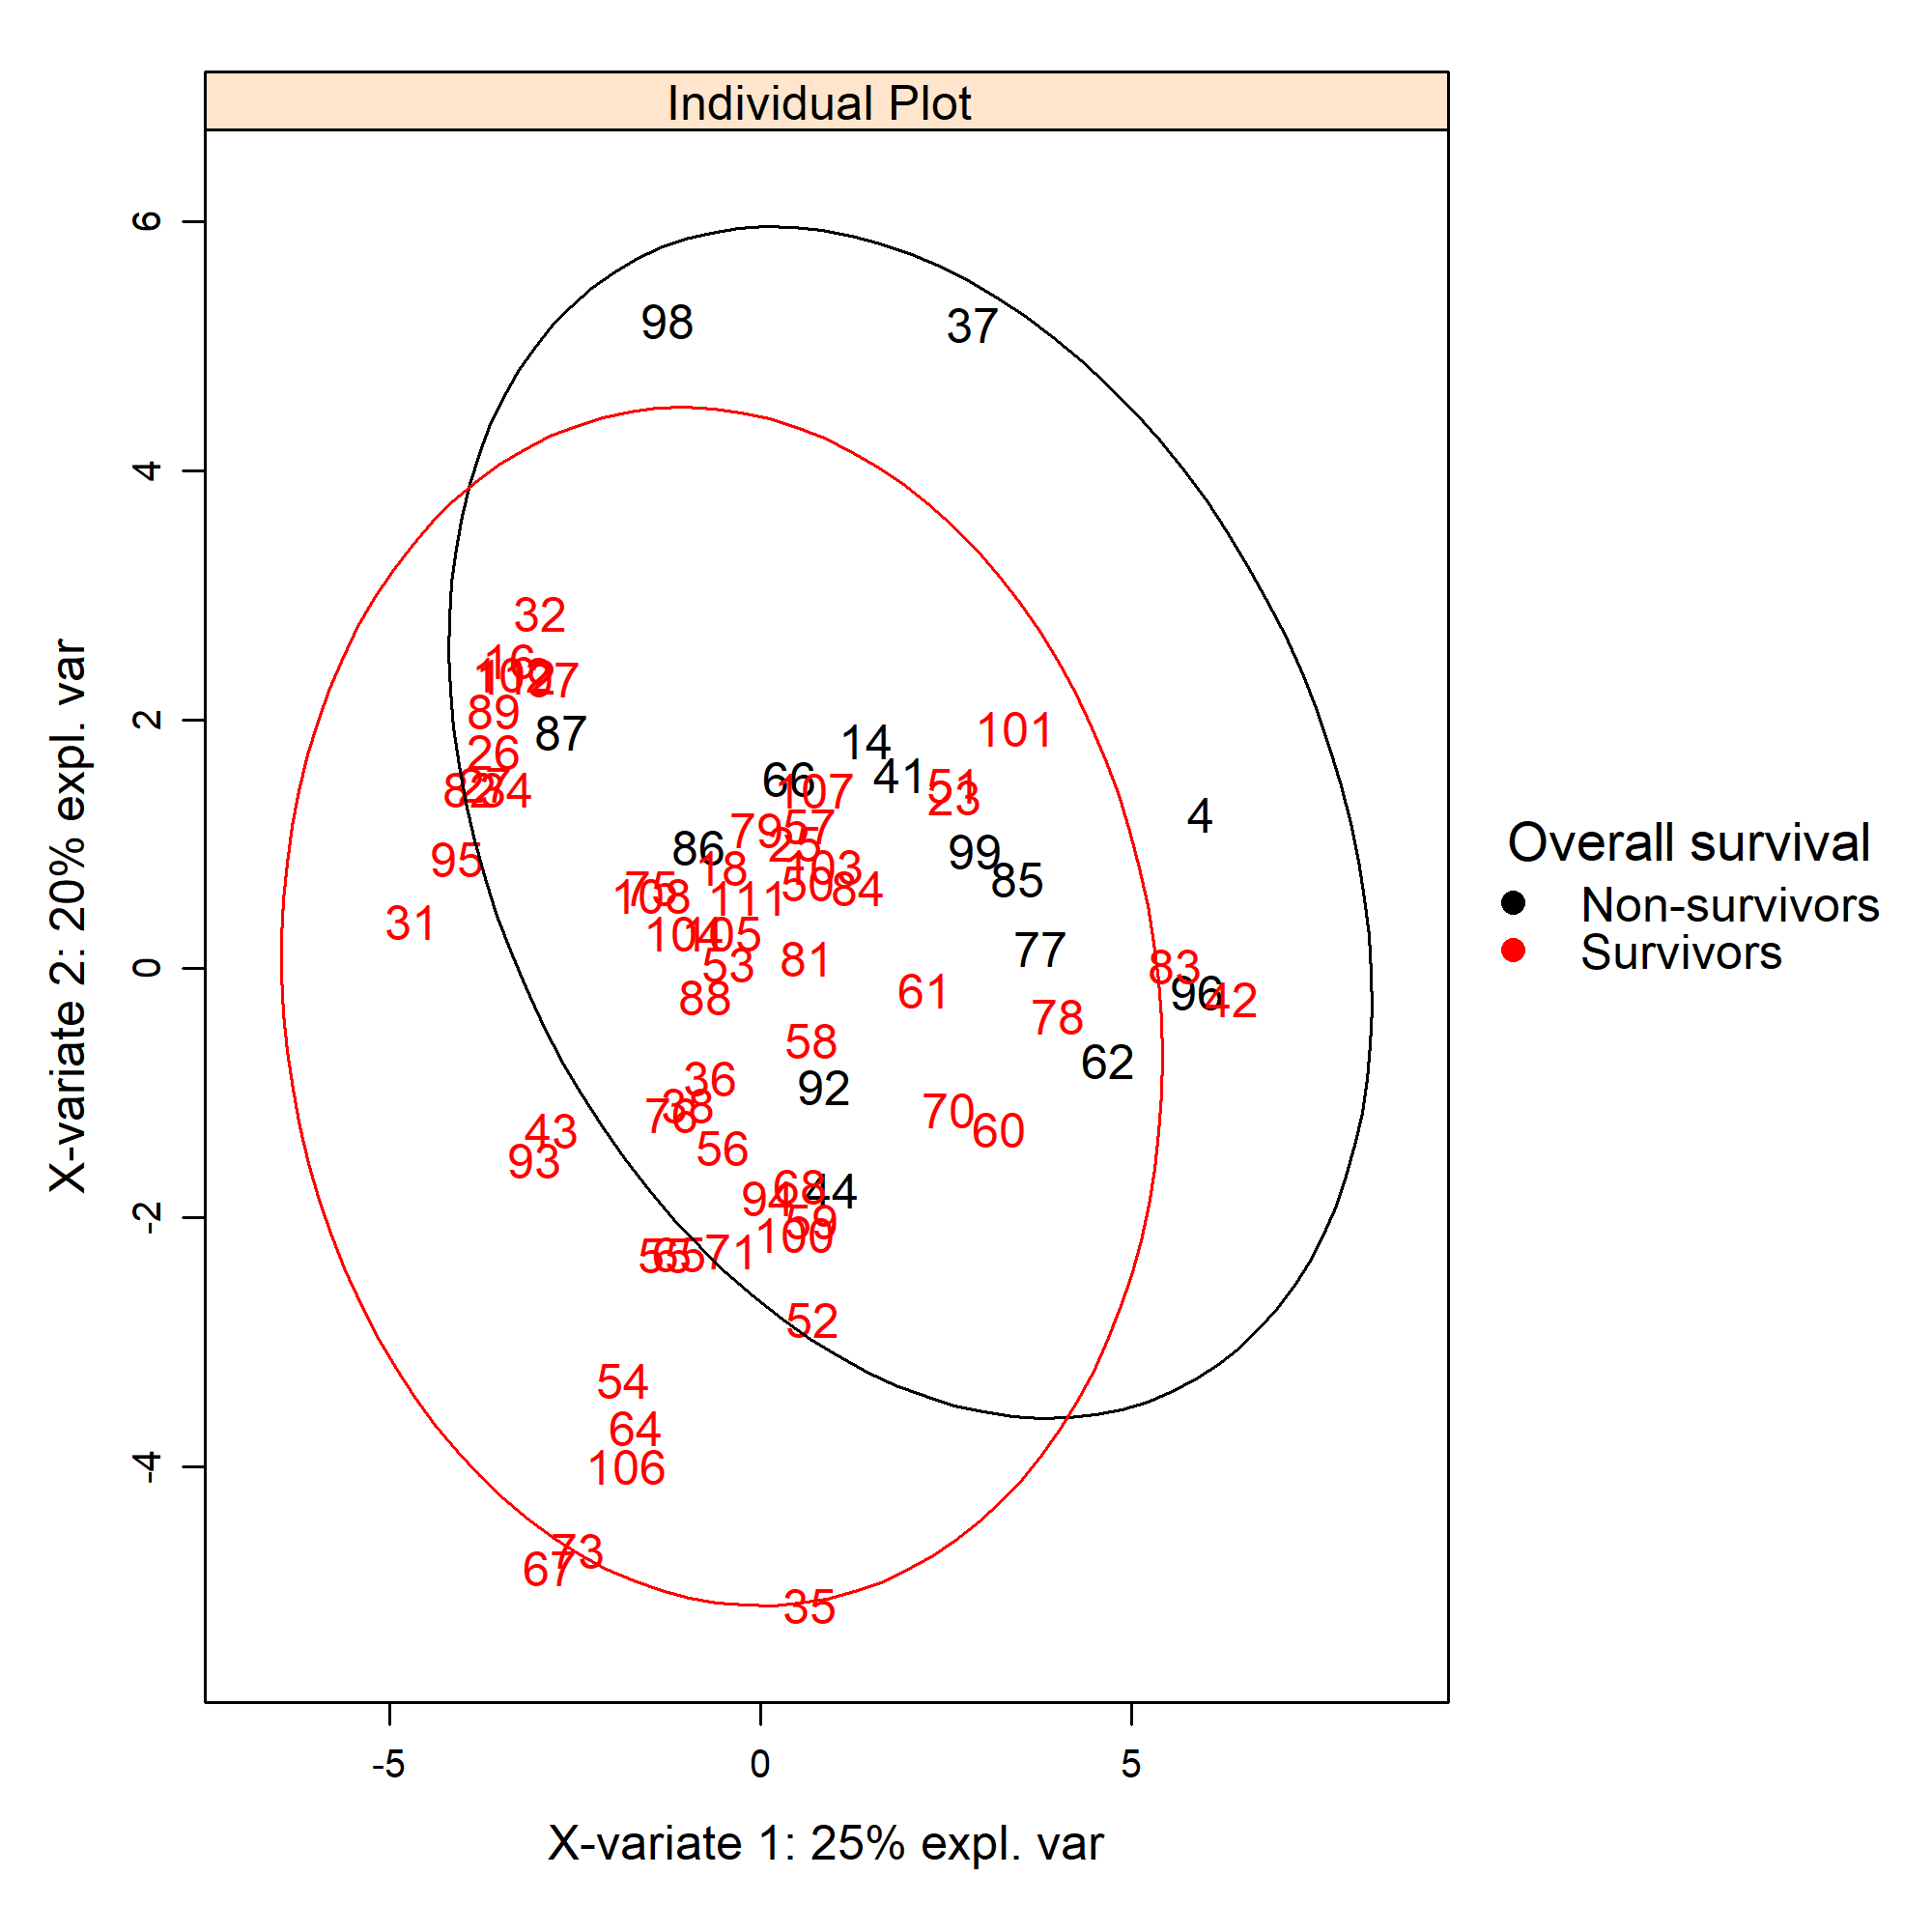


## **Figure S4.** Hierarchical cluster analysis of survivors vs non-survivors (overall survival) based on metabolic profiles of gastric fluid. Patterns of visual separability are apparent.


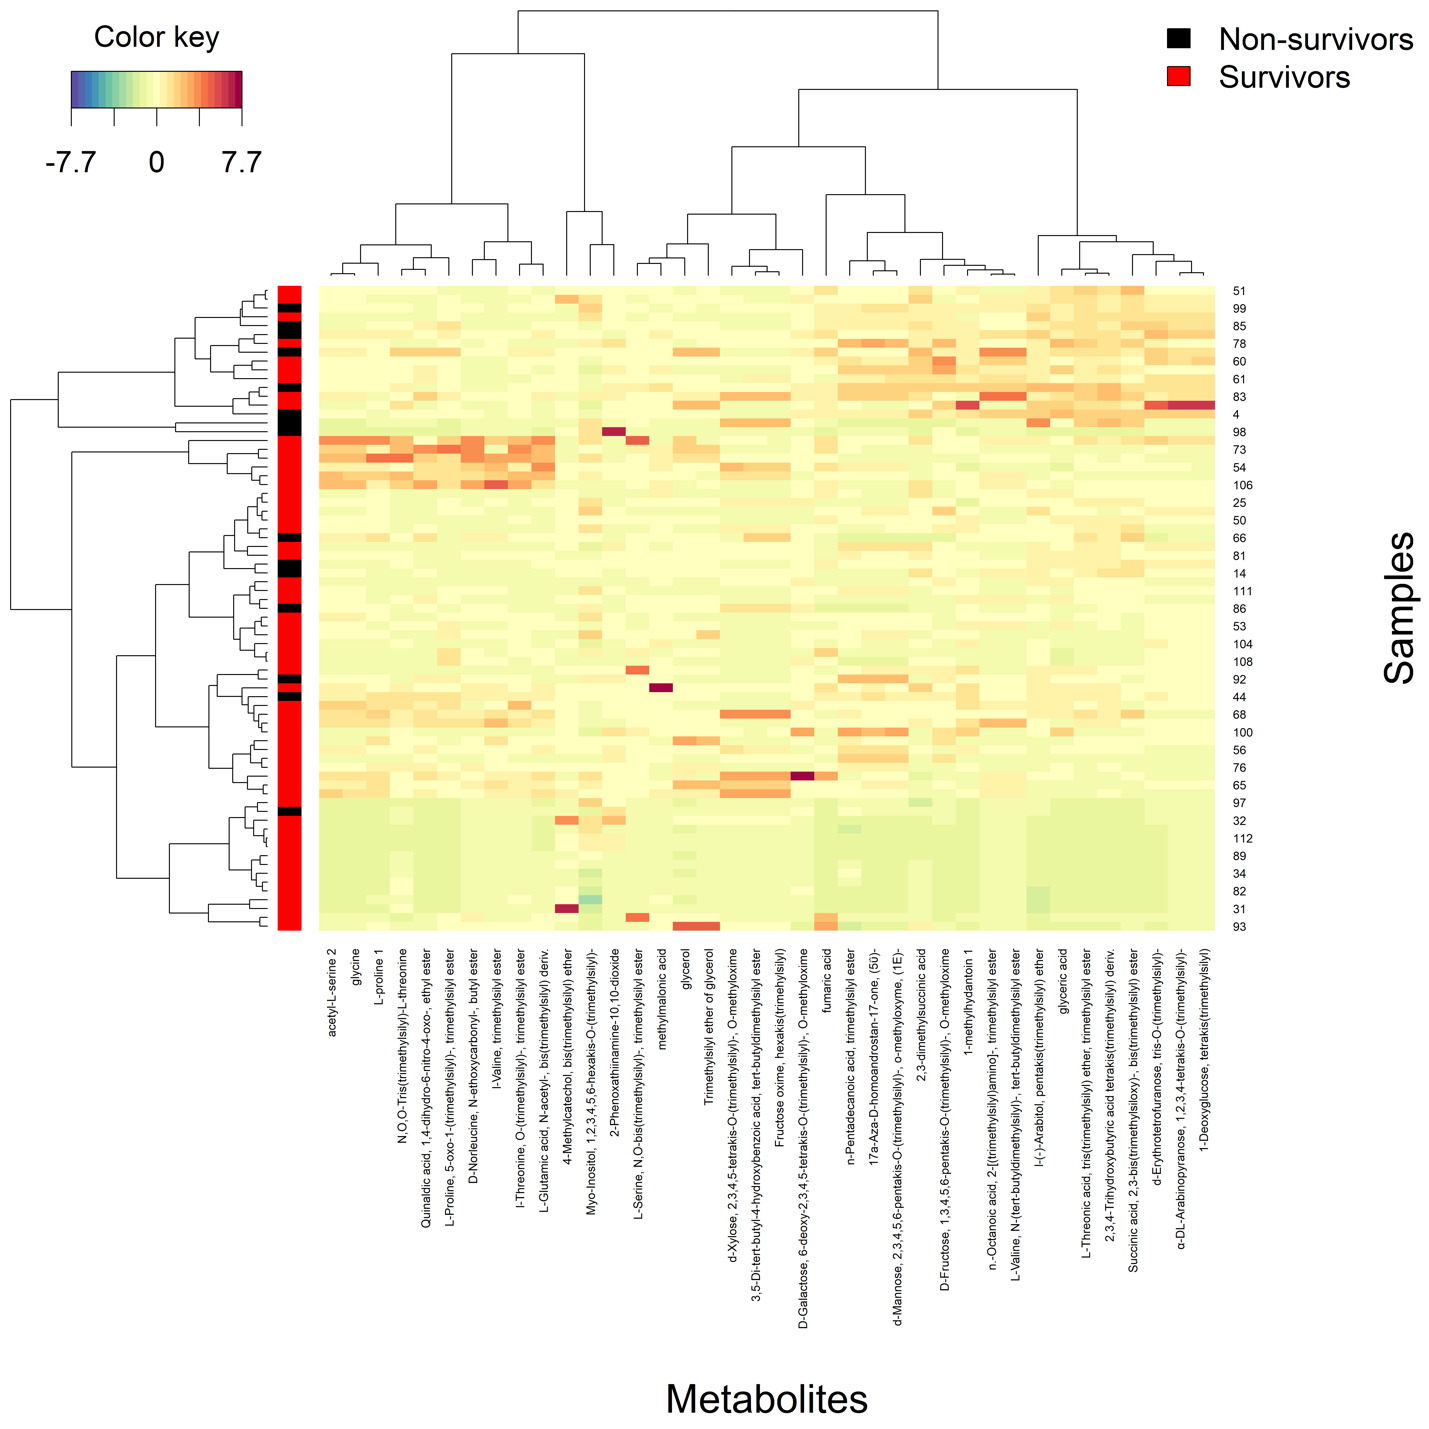


# **Urine**

**Figure S5**. Separation of survivors vs non-survivors (DOL 3) based on metabolic profiles of urine using PLS-DA.


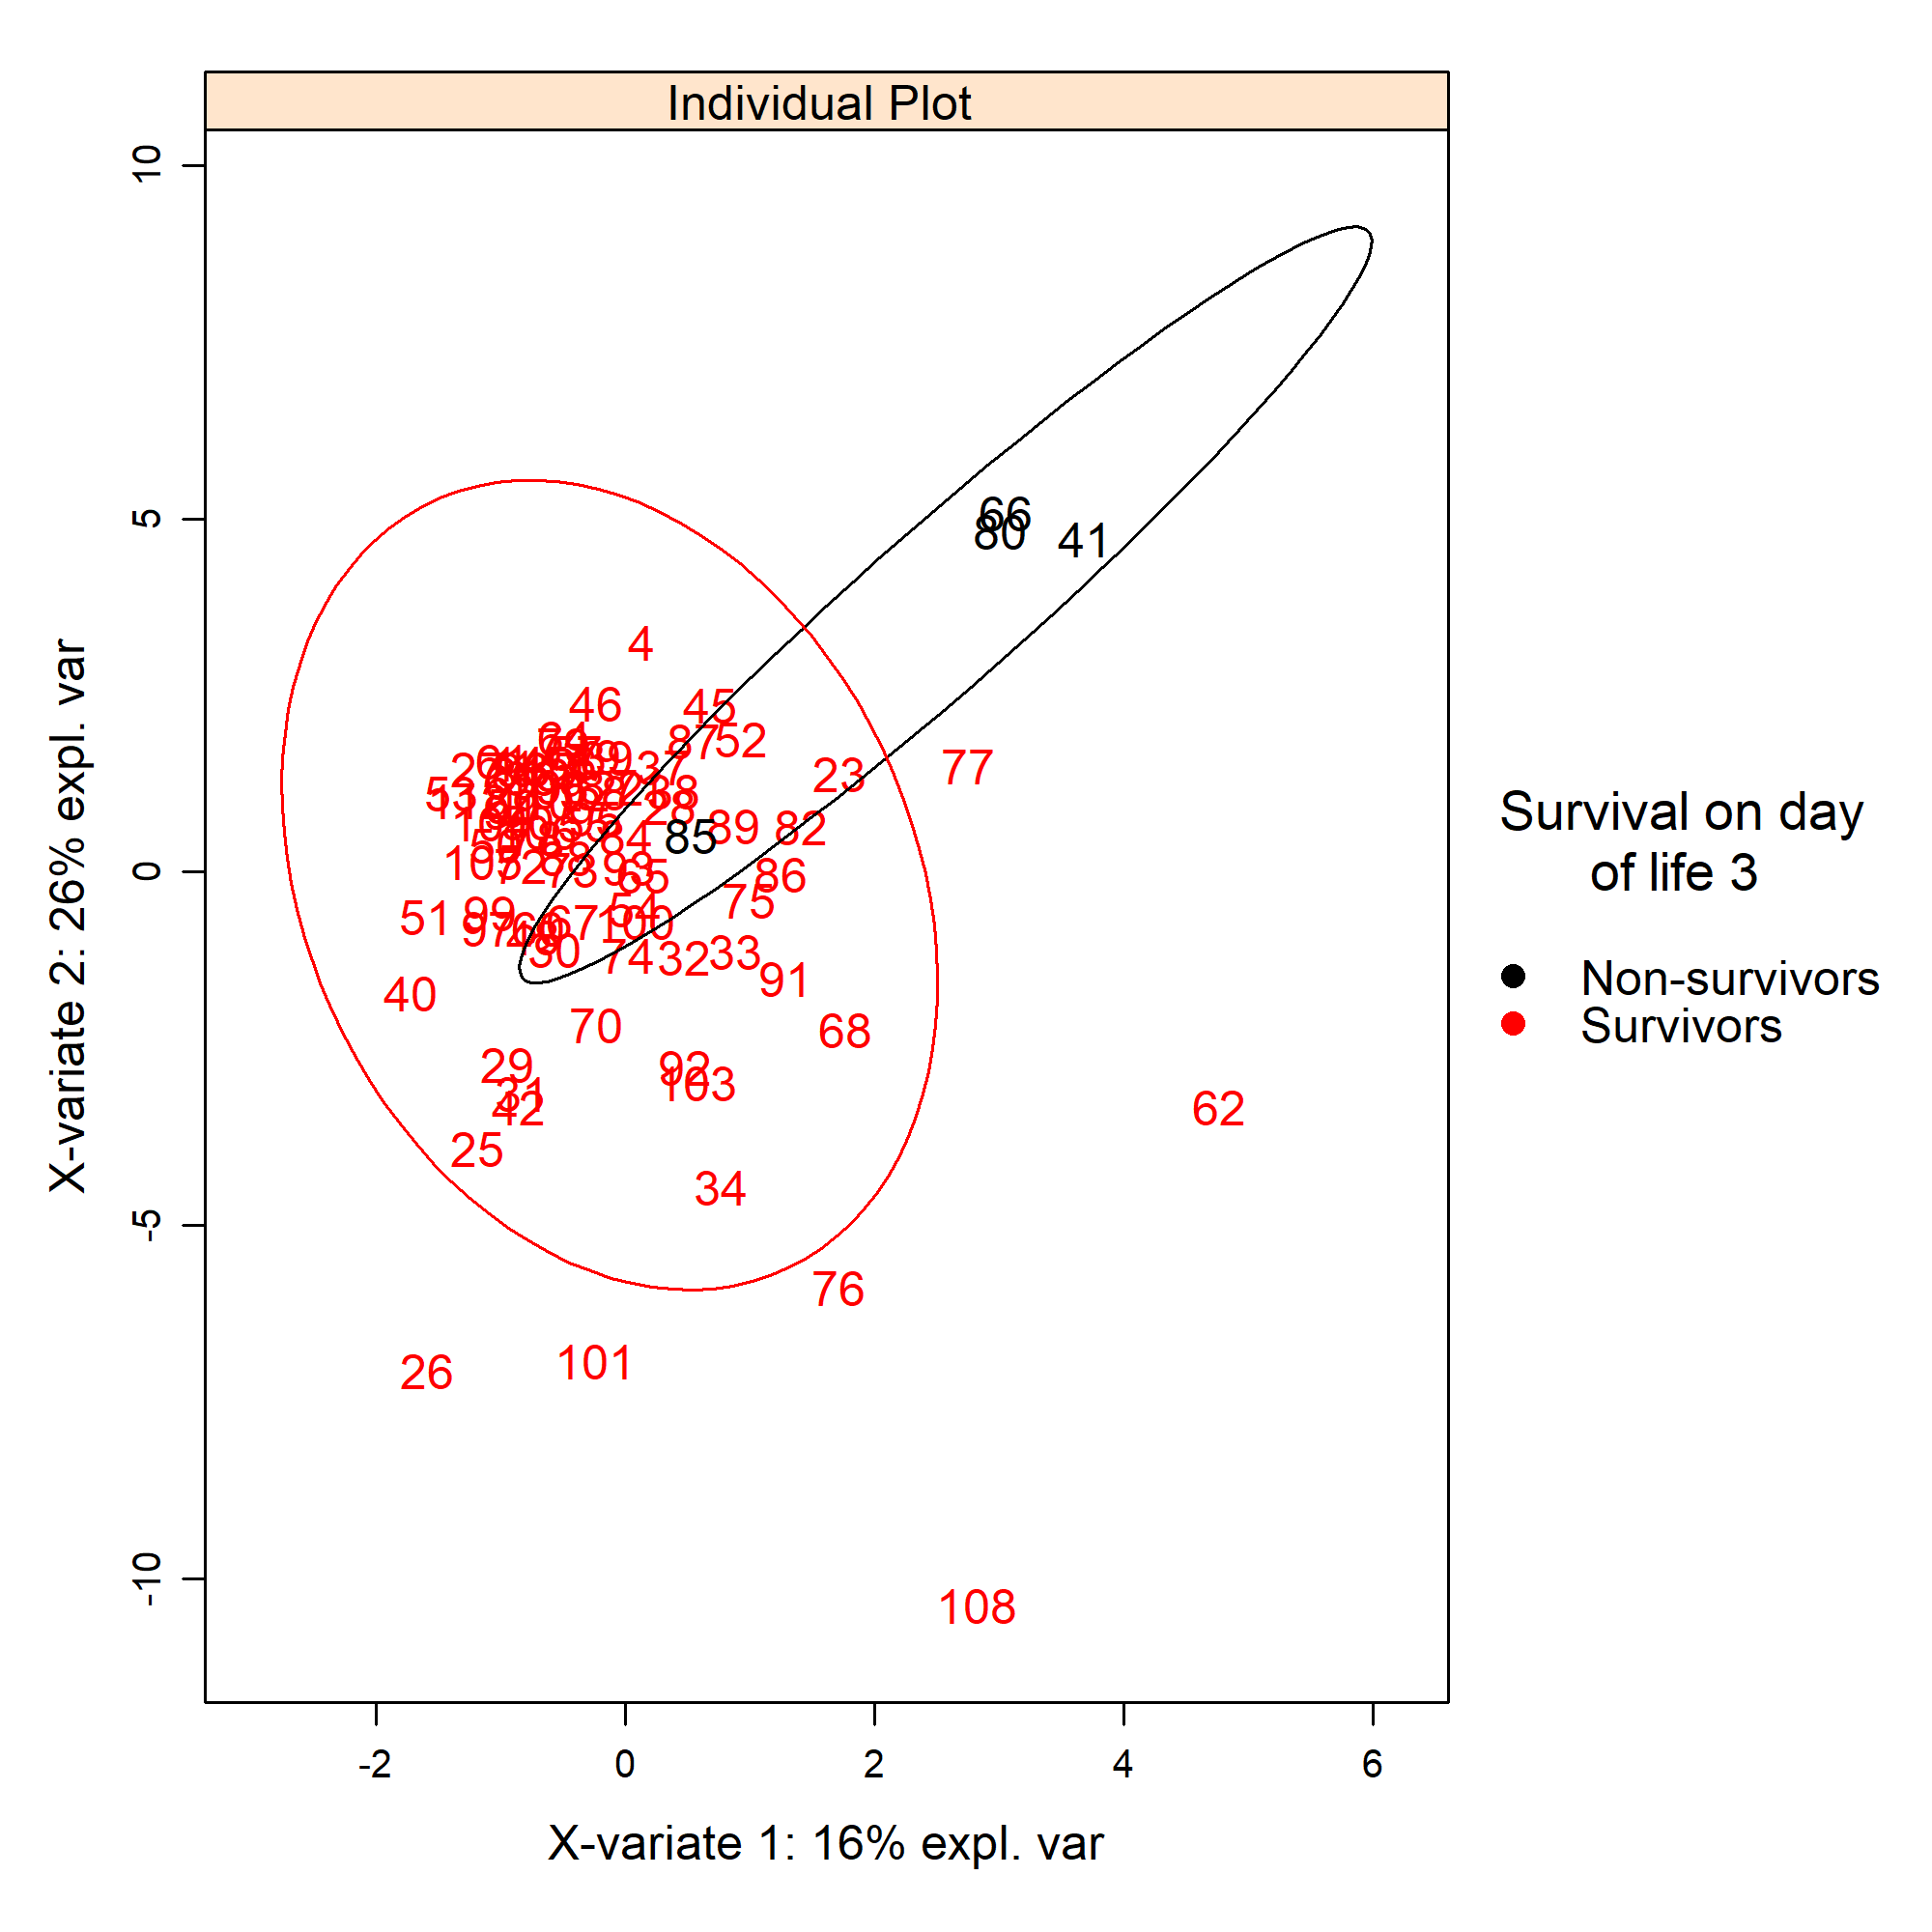


## **Figure S6.** Hierarchical cluster analysis results shown as a heatmap of survivors vs non-survivors (DOL 3) based on metabolic profiles of gastric fluid. Patterns of visual separability exist.


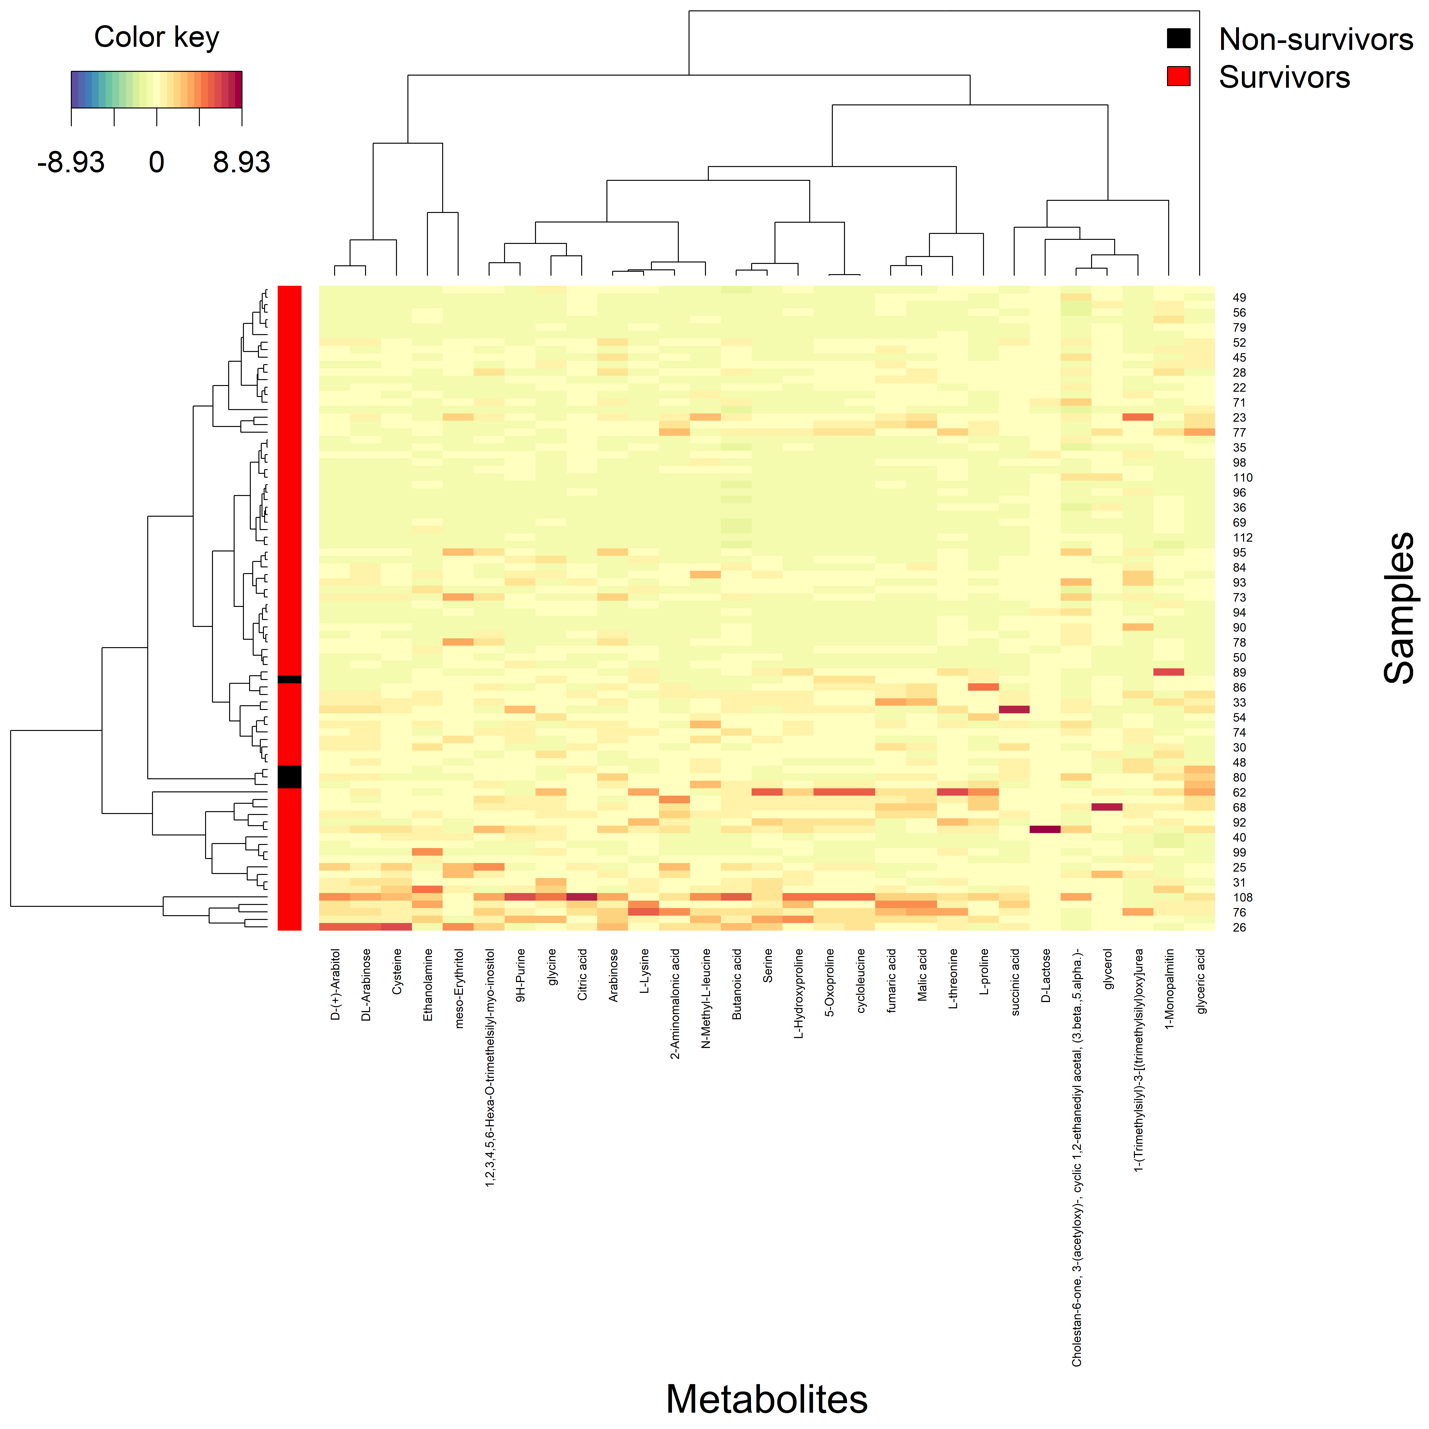


**Figure S7.** Separation of survivors vs non-survivors (DOL15) based on metabolic profiles of urine using PLS-DA.


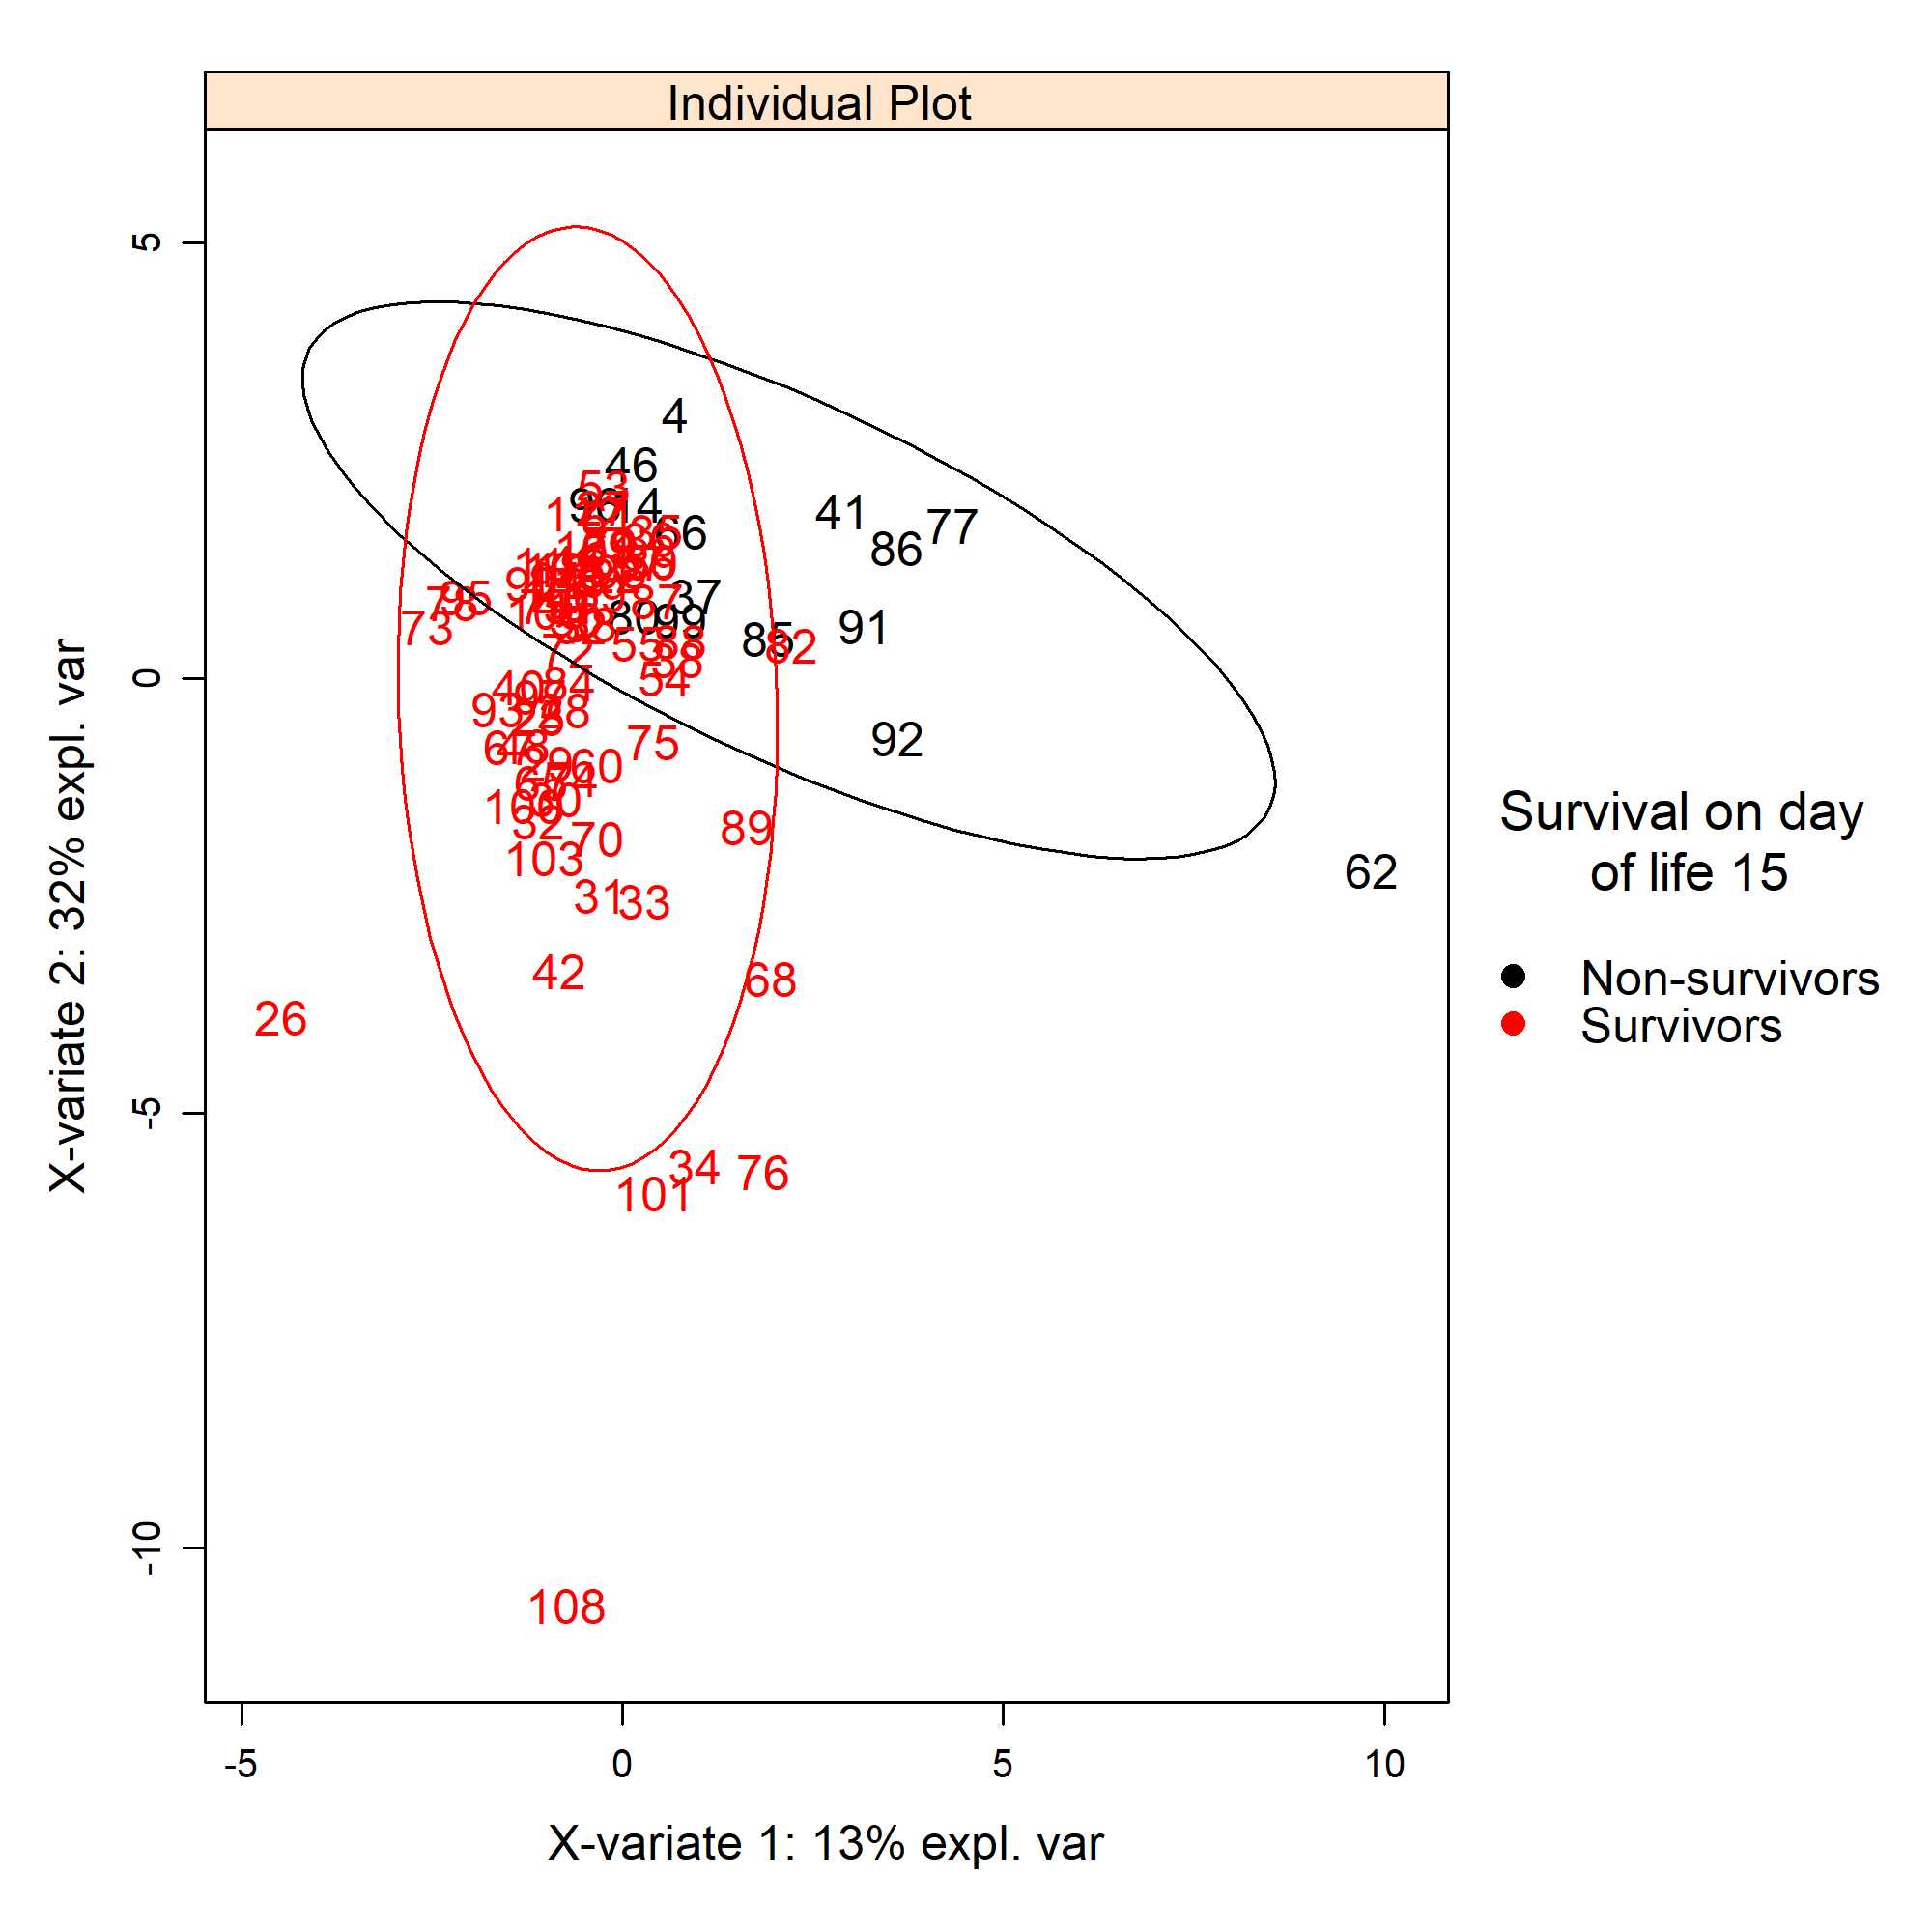


## **Figure S8.** Hierarchical cluster analysis results shown as a heatmap of survivors vs non-survivors (DOL15) based on metabolic profiles of gastric fluid. Patterns of visual separability exist.


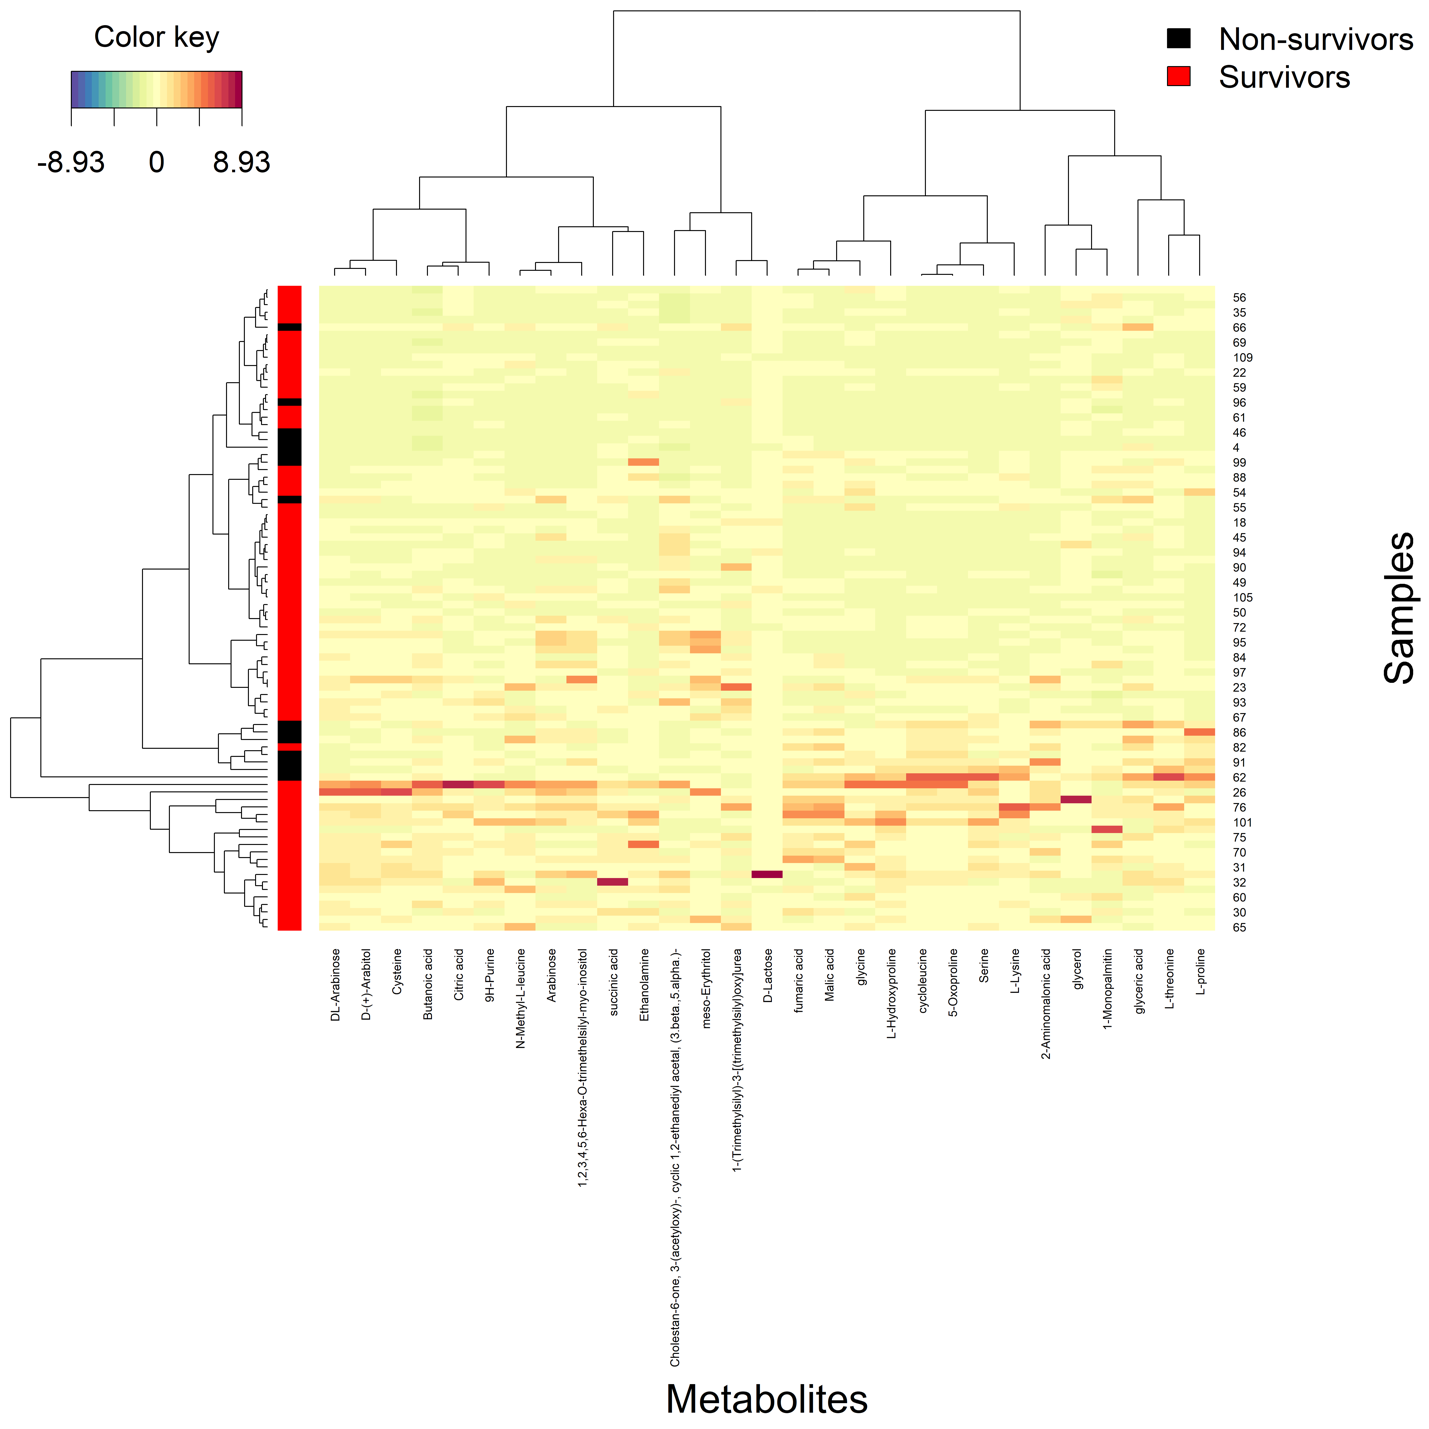


**Figure S9**. Separation of survivors vs non-survivors (overall survival) based on metabolic profiles of urine using PLS-DA.


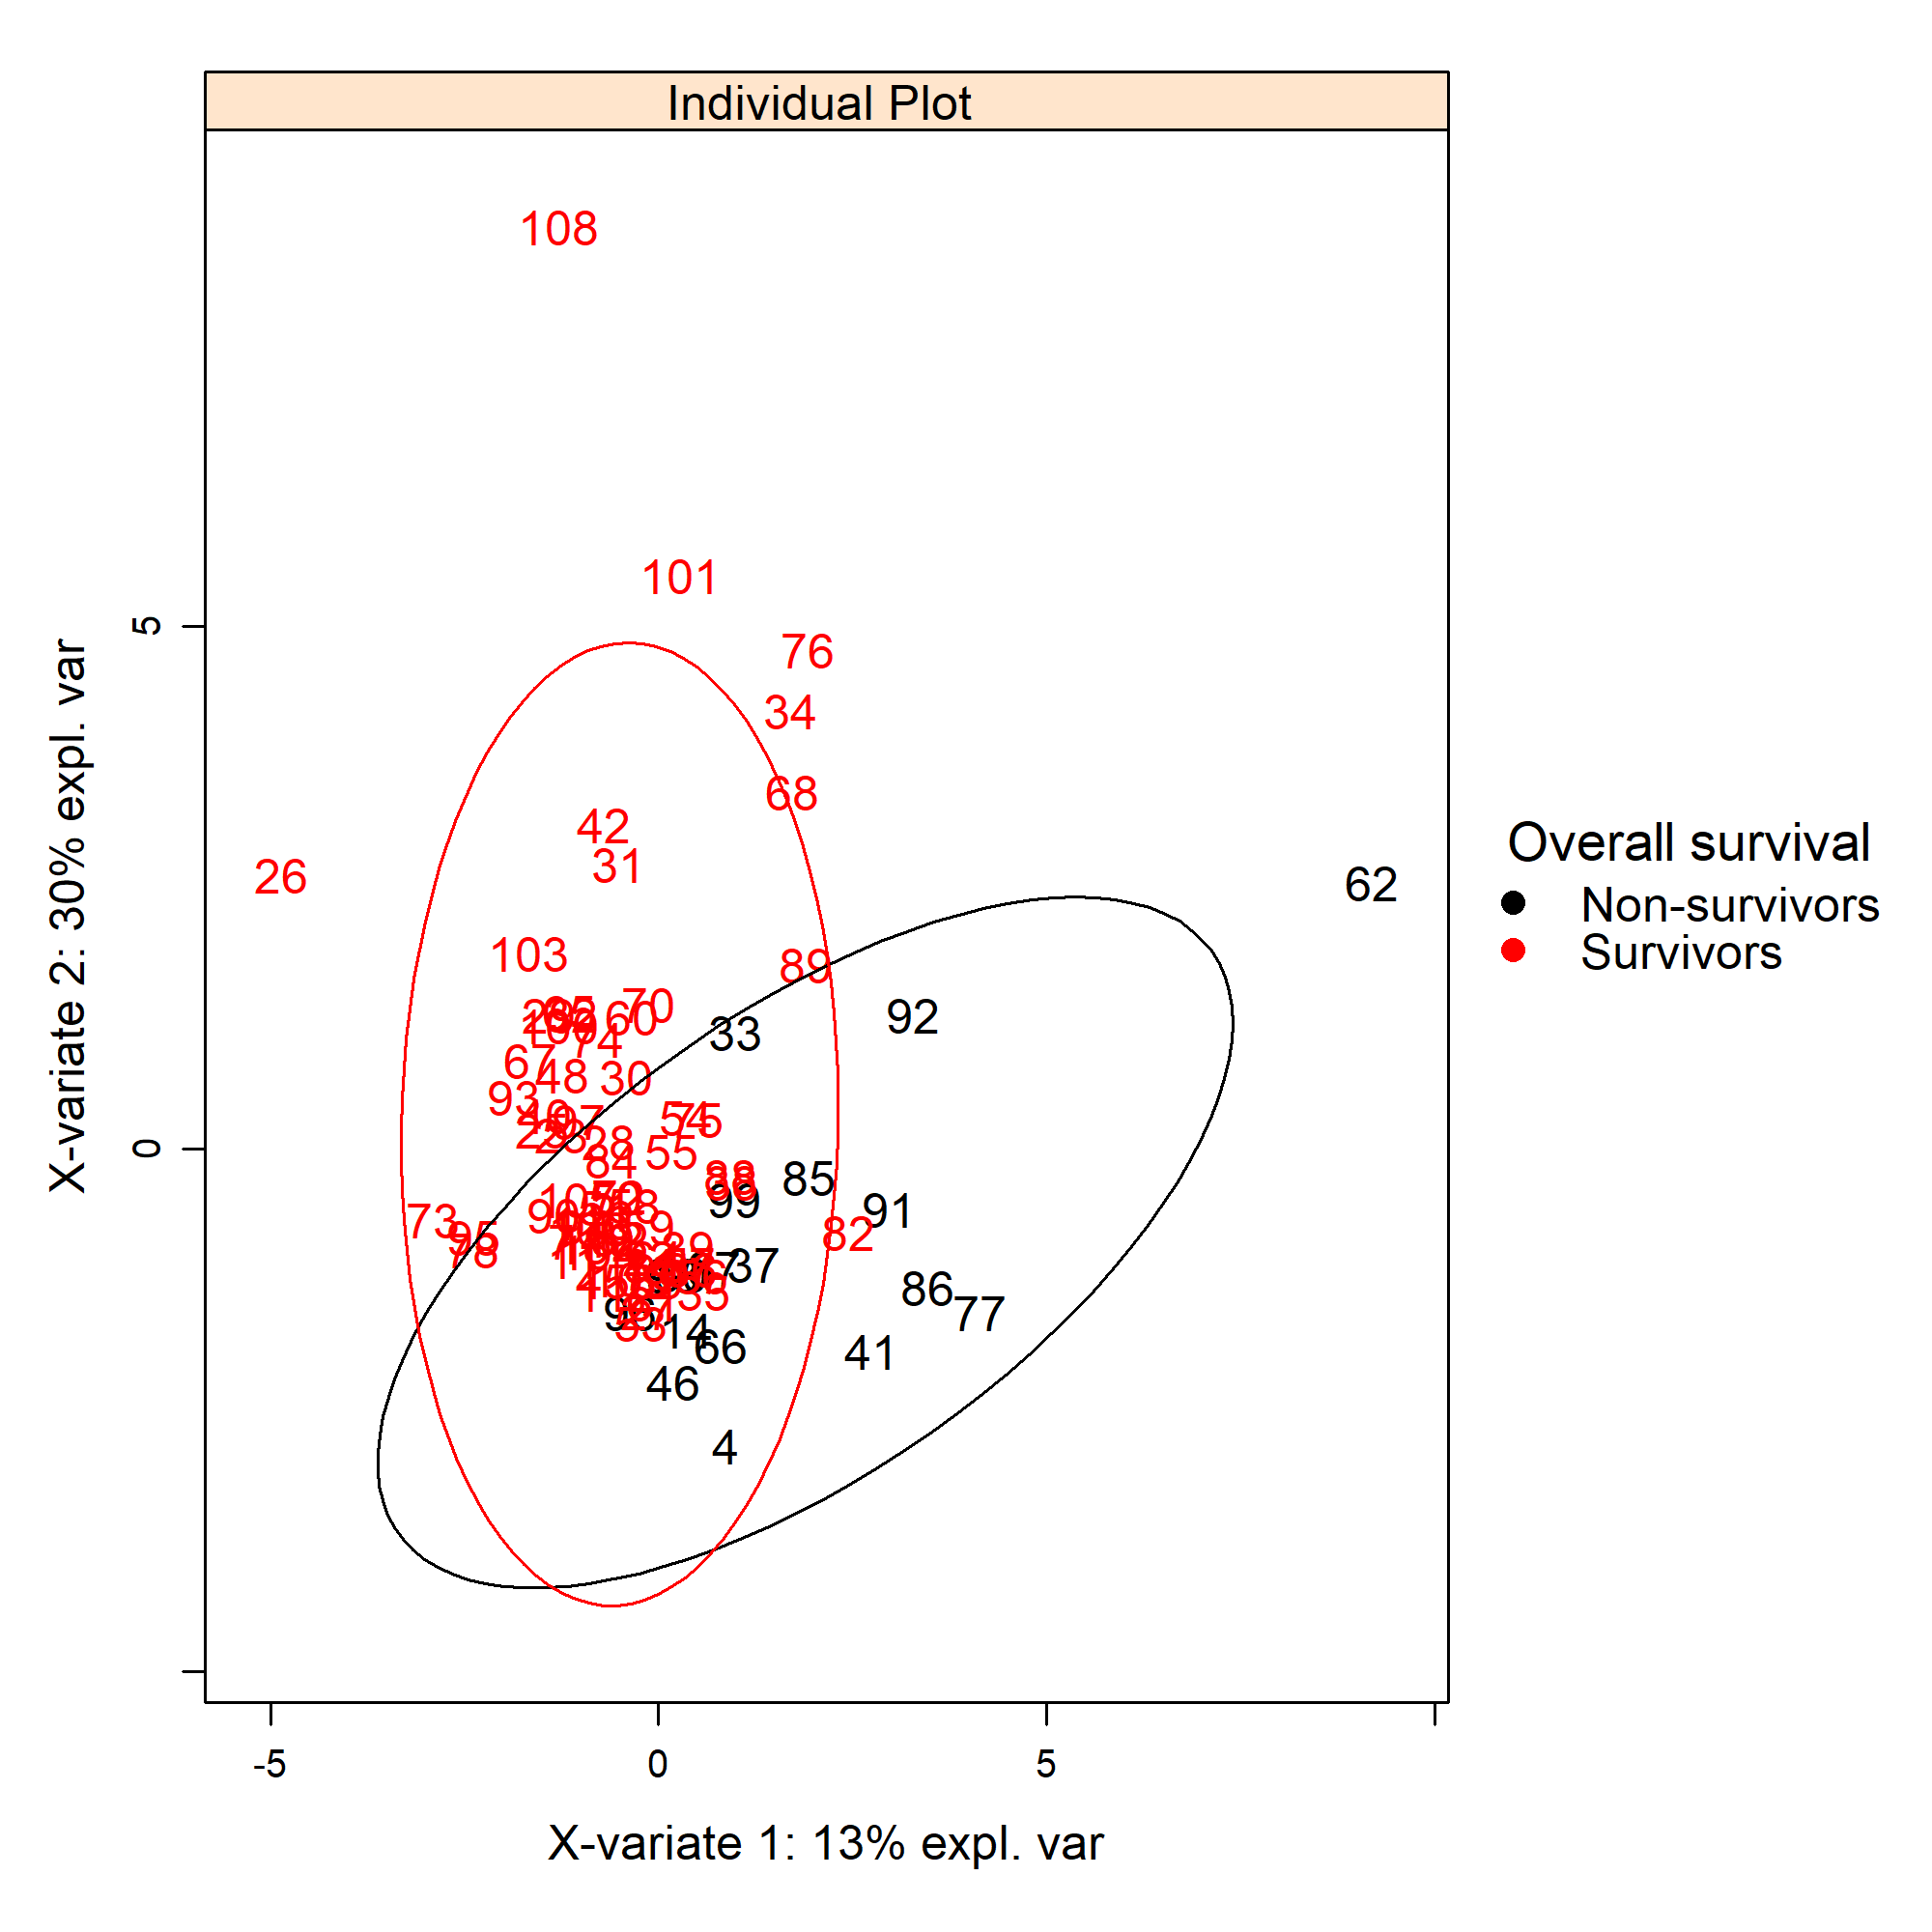


## **Figure S10**. Hierarchical cluster analysis results shown as a heatmap of survivors vs non-survivors (overall survival) based on metabolic profiles of gastric fluid. Patterns of visual separability exist.


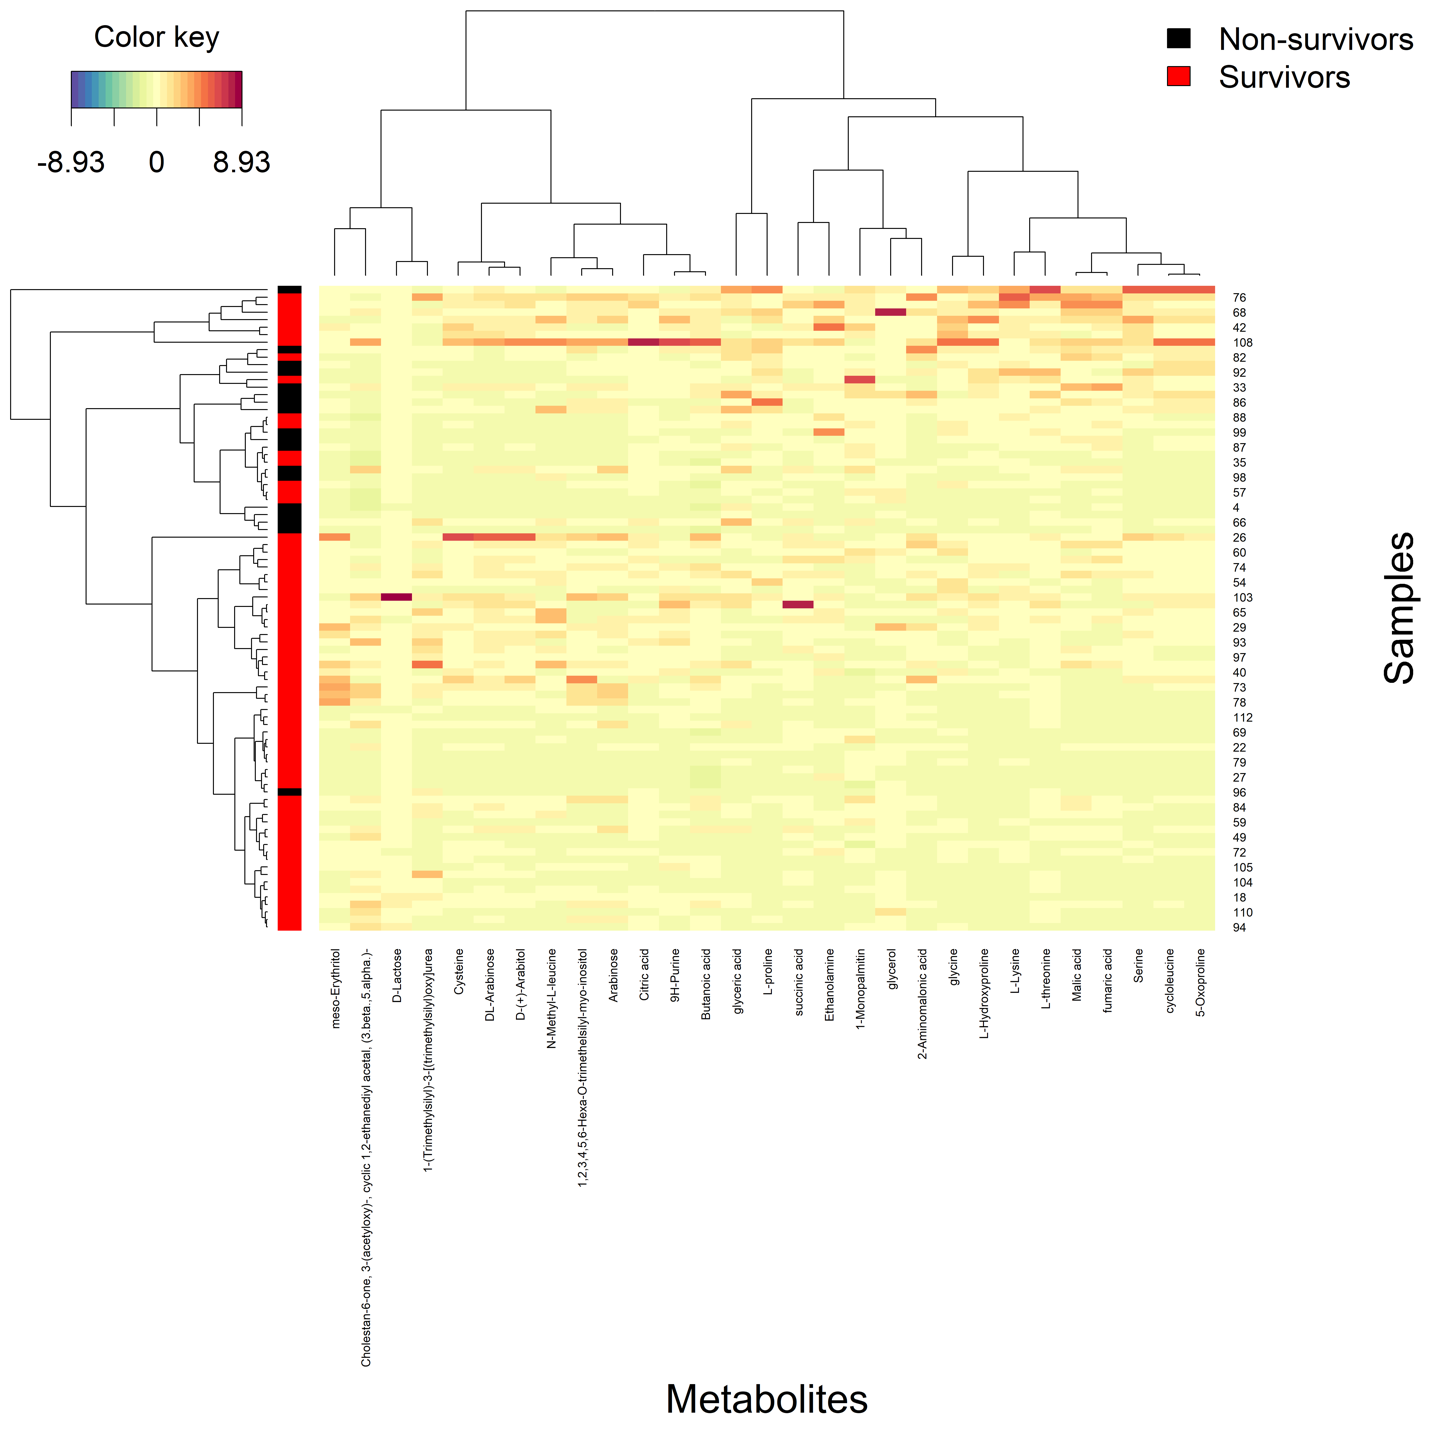

Supplement: Supplementary file 2 [file Suppl file 2. FIGURES .docx]
